# Supplementary material
Source: PubMed Central journal article supplement (PMC3809707)

Fig. S1

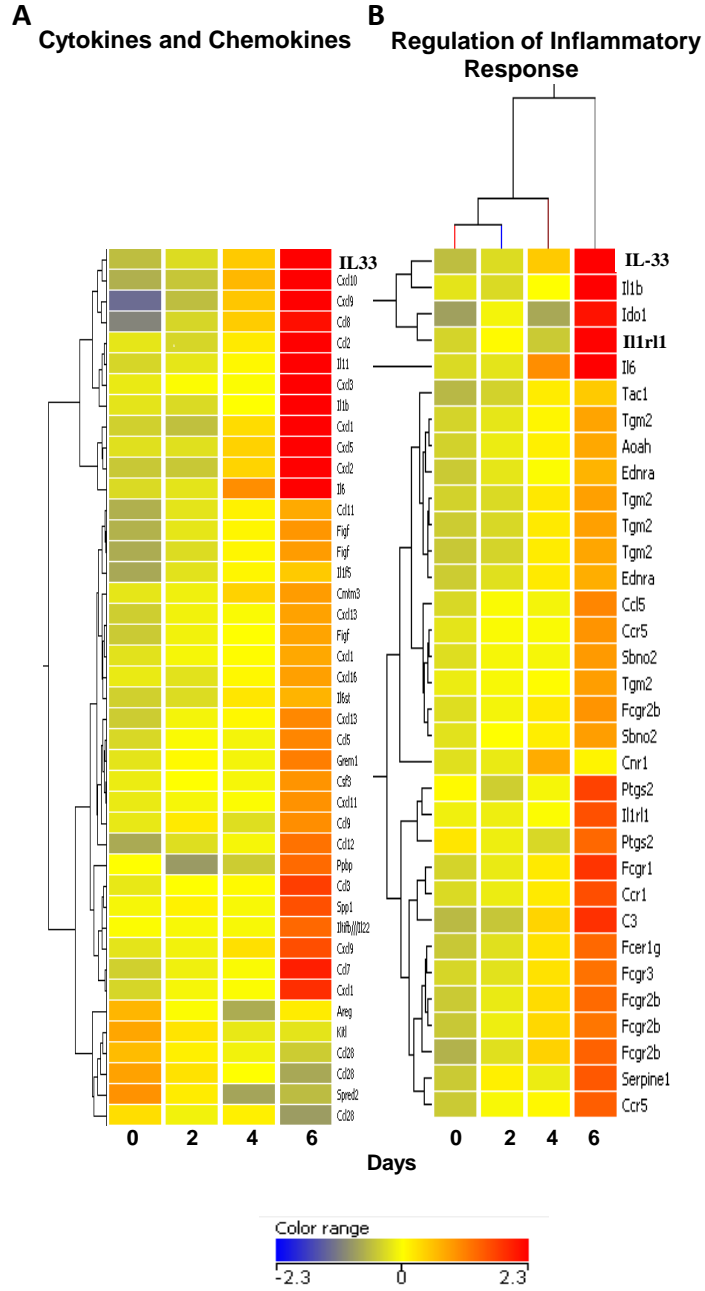

Supplement: imm0140-0070-sd1.pdf [file imm0140-0070-sd1.pdf]

Fig. S2

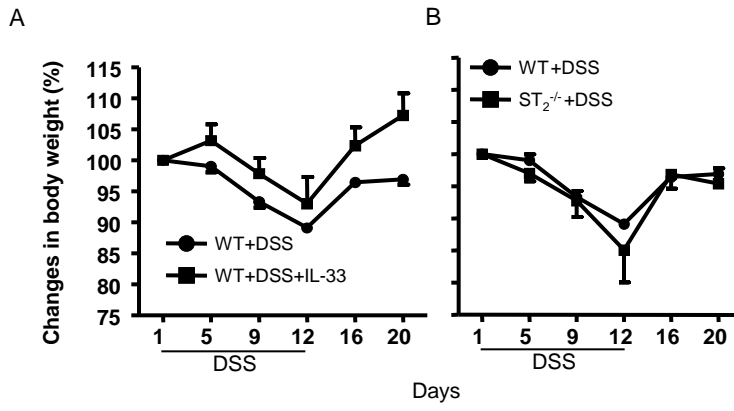

Supplement: imm0140-0070-sd2.pdf [file imm0140-0070-sd2.pdf]

Fig. S3

A

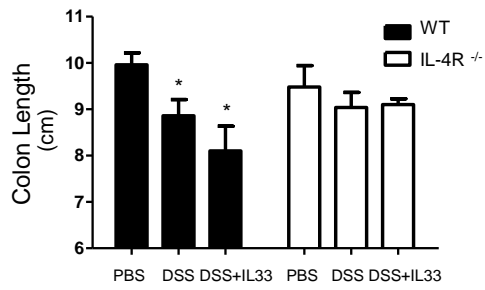

B

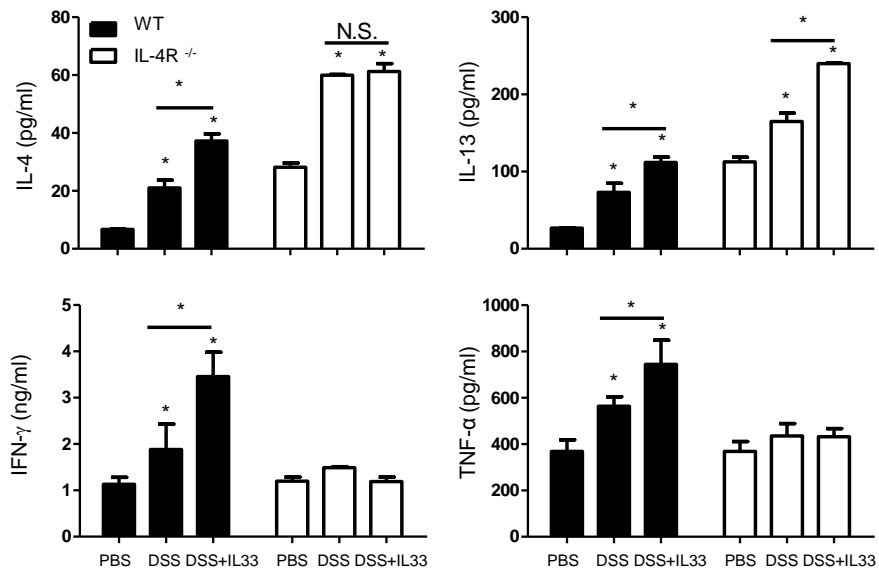

Supplement: imm0140-0070-sd3.pdf [file imm0140-0070-sd3.pdf]
